# Supplementary material for: High-Order Raman Scattering Mediated by Self-trapped Exciton in Halide Double Perovskite
Source: Research Square preprint supplement (doi:10.21203/rs.3.rs-1570838/v1), 2024-10-21
Supplement: Supplementary file 1 [file 63d9373cdf812d42edfa6bf5.docx]

Supplementary Information for

**High-Order Raman Scattering** **Mediated by Self-trapped Exciton in Halide Double Perovskite**

Kai-Xuan Xu1,2#, Jia-Min Lai1,2#, Yuan-Fei Gao3, Feilong Song3, Yu-Jia Sun1,2, Ping-Heng Tan1,2, Jun Zhang1,2,4*

1*State Key Laboratory of Superlattices and Microstructures, Institute of Semiconductors, Chinese Academy of Sciences, Beijing 100083, China*

2*Center of Materials Science and Optoelectronics Engineering, University of Chinese Academy of Sciences, Beijing 100049, China*

3*Beijing Academy of Quantum Information Sciences, Beijing 100193, China*

4*CAS Center of Excellence in Topological Quantum Computation, University of Chinese Academy of Sciences, Beijing 100049, China*

# These authors contributed equally.

*Email: [zhangjwill@semi.ac.cn](mailto:zhangjwill@semi.ac.cn)

1. Identification of phonon modes

**Fig. S1 The polarized Raman spectra excited by 532 nm laser at 295 K.**

The Cs2Ag0.4Na0.6InCl6 perovskite has a cubic structure with space group Fmm1, thus belonging to Oh point. The corresponding Raman tensors are:

, ,,

, , .

We used 532 nm incident light to excite the Cs2Ag0.4Na0.6InCl6 perovskite and identified two kinds of phonon modes by polarized Raman scattering spectroscopy. As shown in Fig. S1, three main peaks located at 295 cm-1, 145 cm-1, and 70 cm-1 exist in VV configuration and diminish in the HV configuration. According to Raman tensors, we designate the peak at 295 cm-1 as A1g mode and peaks at 245 cm-1,145 cm-1, and 70 cm-1 as Eg mode. Based on the Raman selection rule, the Eg mode is silent at HV scattering configuration. However, we observed Eg mode at both HV and VV scattering configurations which may be due to the lattice distortion induced by Na+ doping.

2. Huang-Rhys factor calculation by high-order Raman scattering spectroscopy

Here, we briefly discuss the Huang-Rhys factor in high-order Raman scattering. When only one phonon mode contributes to the resonant Raman process, Raman cross-section for an *n*-phonon process can be written as2, 3：

, (1)

, (2)

where is the electronic transition dipole moment, is the energy difference between the ground state () and the excited state () of electron,, and are the energy of the incident photon, LO phonon, respectively. denotes the intermediate vibrational level in the excited state, and is the homogeneous linewidth. *L* denotes the appropriate associated Laguerre polynomial, and is the dimensionless displacement for the Fröhlich interaction.

According to the sum rule4, , thus Eq. (1) can be expressed as:

. (3)

Then we can write the intensity ratio of different phonon modes:

, (4)

=exp (). (5)

For 2LO and LO, *i. e*., *j*=2 and *k*=1,

, (6)

where is the Huang-Rhys Factor, which can be used to evaluate the electron-phonon coupling strength.

3. Huang-Rhys factor calculation by PL linewidth

On the other hand, we use the broadening of full-width at half-maximum (FWHM) of PL spectrum with increased temperature to evaluate the electron-phonon coupling. The temperature dependence of FWHM of exciton can be fitted by5:

, (7)

where is the phonon frequency, *S* is the Huang-Rhys factor, and *k* is the Boltzmann constant. The *S* factor in Eq. (7) describes the average electron-phonon coupling over a range of temperatures, where the temperature effects do not take into account. The *S* factor we obtained by Eq. (7) is (Fig. S2) which is close to the reported value6.

**Fig. S2 Fitting results of FWHM of PL spectra as a function of temperature.**

**Reference**

1. G. Yang, et al. Double perovskite microcrystals-based white light-emitting diodes without reabsorption of multiphase phosphors. *Opt. Lett.* **46,** 6043-6046 (2021).

2. R. Merlin, G. Güntherodt, R. Humphreys, M. Cardona, R. Suryanarayanan & F. Holtzberg Multiphonon processes in YbS. *Phys. Rev. B* **17,** 4951-4958 (1978).

3. A. P. Alivisatos, T. D. Harris, P. J. Carroll, M. L. Steigerwald & L. E. Brus Electron–vibration coupling in semiconductor clusters studied by resonance Raman spectroscopy. *J. Chem. Phys.* **90,** 3463-3468 (1989).

4. A. C. Albrecht On the Theory of Raman Intensities. *J. Chem. Phys.* **34,** 1476-1484 (1961).

5. W. Stadler, et al. Optical investigations of defects in Cd1-xZnxTe. *Phys. Rev. B* **51,** 10619-10630 (1995).

6. J. Luo, et al. Efficient and stable emission of warm-white light from lead-free halide double perovskites. *Nature* **563,** 541-545 (2018).
